# Supplementary material
Source: ML conference proceedings conference paper supplement (https://proceedings.neurips.cc/paper_files/paper/2020/hash/1fd09c5f59a8ff35d499c0ee25a1d47e-Abstract.html)
Supplement: Supplementary file [file 1fd09c5f59a8ff35d499c0ee25a1d47e-Supplemental.zip]

Test  
loss

Nonlinear  
peak

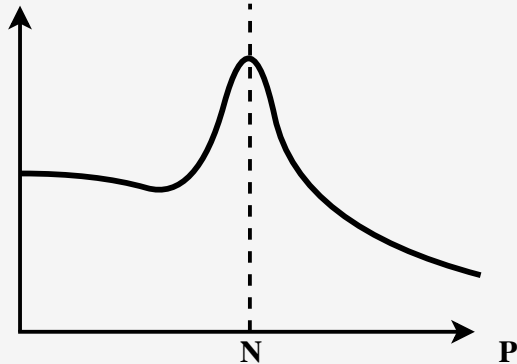

Test  
loss

Linear  
peak

Nonlinear  
peak

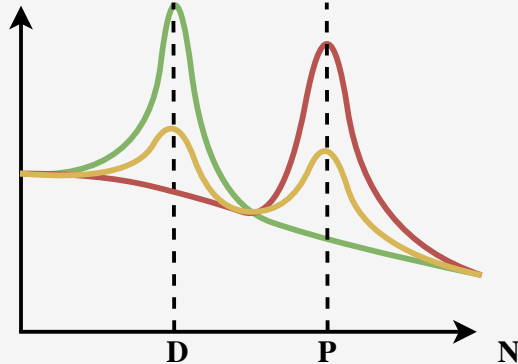

- Strongly nonlinear
- Weakly nonlinear
- Linear
