# Supplementary material
Source: ML conference proceedings conference paper supplement (https://proceedings.neurips.cc/paper_files/paper/2020/hash/1fd09c5f59a8ff35d499c0ee25a1d47e-Abstract.html)

Test loss

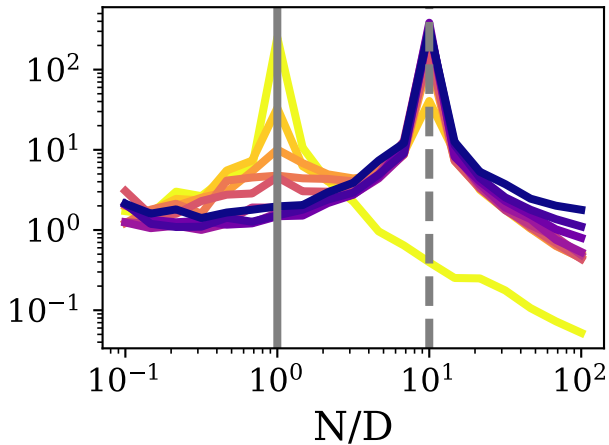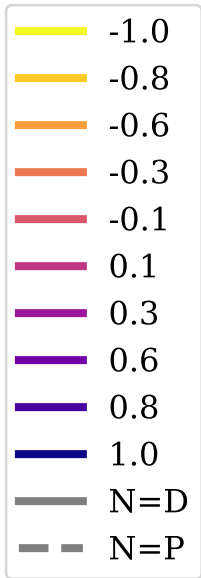

Supplement: Supplementary file [file 1fd09c5f59a8ff35d499c0ee25a1d47e-Supplemental.zip]
